# Supplementary material for: Bioinformatics analysis of whole slide images reveals significant neighborhood preferences of tumor cells in Hodgkin lymphoma
Source: PLOS journal article supplement (doi:10.1371/journal.pcbi.1007516), 2020-01-21
Supplement: S1 (10.1371/journal.pcbi.1007516.s001) [file journal.pcbi.1007516.s001.pdf]

## A) Symmetrical neighborhood relation

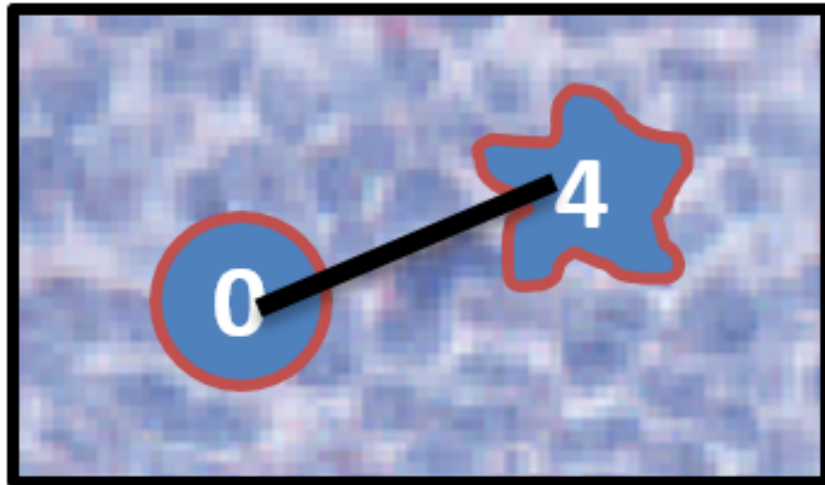

| CP | NCP |
|----|-----|
| 0  | 4   |
| 4  | 0   |

## B) Unsymmetrical neighborhood relation

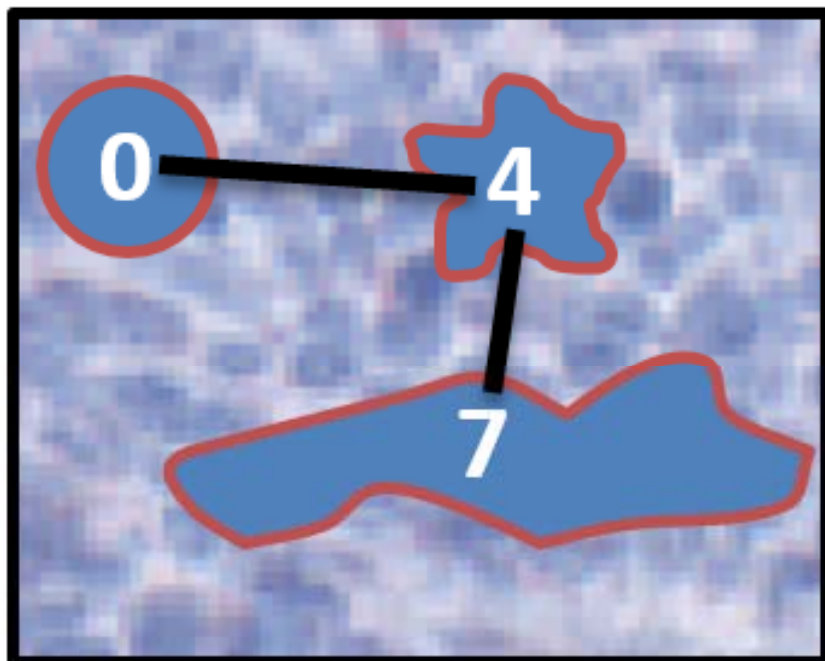

| CP | NCP |
|----|-----|
| 0  | 4   |
| 4  | 7   |
| 7  | 4   |
