# Supplementary material for: Bioinformatics analysis of whole slide images reveals significant neighborhood preferences of tumor cells in Hodgkin lymphoma
Source: PLOS journal article supplement (doi:10.1371/journal.pcbi.1007516), 2020-01-21
Supplement: S2 (10.1371/journal.pcbi.1007516.s002) [file journal.pcbi.1007516.s002.pdf]

A) 35 histological images

|   | 0         | 1        | 2        | 3        | 4         | 5         | 6         | 7         |
|---|-----------|----------|----------|----------|-----------|-----------|-----------|-----------|
| 0 | 31 (89%)  | -6 (17%) | 4 (11%)  | -3 (9%)  | -15 (43%) | -18 (51%) | -26 (74%) | -18 (51%) |
| 1 | 0         | 14 (40%) | -1 (3%)  | 7 (20%)  | -6 (17%)  | 8 (23%)   | -6 (17%)  | 8 (23%)   |
| 2 | 5 (14%)   | -1 (3%)  | 7 (20%)  | 1 (3%)   | -3 (9%)   | -5 (14%)  | 0         | 1 (3%)    |
| 3 | -1 (3%)   | 5 (14%)  | 0        | 6 (17%)  | -4 (11%)  | 4 (11%)   | -1 (3%)   | 2 (6%)    |
| 4 | -9 (26%)  | -8 (23%) | -4 (11%) | -6 (17%) | 17 (49%)  | -1 (3%)   | 9 (26%)   | 5 (14%)   |
| 5 | -15 (43%) | 10 (29%) | -2 (6%)  | 2 (6%)   | 1 (3%)    | 19 (54%)  | -3 (9%)   | 20 (57%)  |
| 6 | -24 (69%) | -8 (23%) | 2 (6%)   | -3 (9%)  | 9 (26%)   | 0         | 23 (66%)  | 3 (9%)    |
| 7 | -13 (37%) | 6 (17%)  | -1 (3%)  | 2 (6%)   | -1 (3%)   | 15 (43%)  | 3 (9%)    | 15 (43%)  |

B) 12 histological images diagnosed as NScHL

|   | 0        | 1        | 2       | 3        | 4        | 5        | 6        | 7        |
|---|----------|----------|---------|----------|----------|----------|----------|----------|
| 0 | 10 (83%) | -1 (8%)  | 0       | -1 (8%)  | -5 (42%) | -4 (33%) | -8 (67%) | -5 (42%) |
| 1 | 1 (8%)   | 7 (58%)  | 0       | 3 (25%)  | -3 (25%) | 3 (25%)  | -2 (17%) | 3 (25%)  |
| 2 | 1 (8%)   | -1 (8%)  | 2 (17%) | 0        | 0        | -2 (17%) | 0        | -1 (8%)  |
| 3 | 1 (8%)   | 1 (8%)   | 0       | 3 (25%)  | -2 (17%) | 1 (8%)   | 0        | 1 (8%)   |
| 4 | -2 (17%) | -3 (25%) | -1 (8%) | -3 (25%) | 6 (50%)  | -1 (8%)  | 2 (17%)  | -3 (25%) |
| 5 | -4 (33%) | 3 (25%)  | 0       | 0        | 1 (8%)   | 6 (50%)  | -1 (8%)  | 8 (67%)  |
| 6 | -7 (58%) | -4 (33%) | 1 (8%)  | -2 (17%) | 4 (33%)  | 0        | 7 (58%)  | 1 (8%)   |
| 7 | -2 (17%) | 2 (17%)  | 0       | 1 (8%)   | -1 (8%)  | 7 (58%)  | 1 (8%)   | 2 (8%)   |

C) 12 histological images diagnosed as MCcHL

|   | 0        | 1        | 2        | 3        | 4        | 5        | 6        | 7        |
|---|----------|----------|----------|----------|----------|----------|----------|----------|
| 0 | 11 (92%) | 1 (8%)   | 3 (25%)  | 1 (8%)   | -6 (50%) | -6 (50%) | -8 (67%) | -5 (42%) |
| 1 | 1 (8%)   | 3 (25%)  | 0        | 2 (17%)  | -2 (17%) | 1 (8%)   | -3 (25%) | 2 (17%)  |
| 2 | 2 (17%)  | 0        | 4 (33%)  | 1 (8%)   | -3 (25%) | -2 (17%) | 0        | 0        |
| 3 | 0        | 2 (17%)  | 0        | 2 (17%)  | -2 (17%) | 1 (8%)   | -1 (8%)  | 1 (8%)   |
| 4 | -3 (25%) | -3 (25%) | -3 (25%) | -3 (25%) | 7 (58%)  | -1 (8%)  | 4 (33%)  | -2 (17%) |
| 5 | -5 (42%) | 3 (25%)  | -2 (17%) | 1 (8%)   | -1 (8%)  | 6 (50%)  | -1 (8%)  | 7 (58%)  |
| 6 | -7 (58%) | -3 (25%) | 1 (8%)   | -2 (17%) | 4 (33%)  | 0        | 8 (67%)  | -1 (8%)  |
| 7 | -4 (33%) | 2 (17%)  | -1 (8%)  | 1 (8%)   | -1 (8%)  | 3 (25%)  | -1 (8%)  | 5 (42%)  |

D) 11 histological images diagnosed as LA

|   | 0         | 1        | 2       | 3        | 4        | 5        | 6         | 7        |
|---|-----------|----------|---------|----------|----------|----------|-----------|----------|
| 0 | 10 (91%)  | -6 (55%) | 1 (9%)  | -3 (27%) | -4 (36%) | -8 (73%) | -10 (91%) | -8 (73%) |
| 1 | -2 (18%)  | 4 (36%)  | -1 (9%) | 2 (18%)  | -1 (9%)  | 4 (36%)  | -1 (9%)   | 3 (27%)  |
| 2 | 2 (18%)   | 0        | 1 (9%)  | 0        | 0        | -1 (9%)  | 0         | 0        |
| 3 | -2 (18%)  | 2 (18%)  | 0       | 1 (9%)   | 0        | 2 (18%)  | 0         | 0        |
| 4 | -4 (36%)  | -2 (18%) | 0       | 0        | 4 (36%)  | 1 (9%)   | 3 (27%)   | 0        |
| 5 | -6 (55%)  | 4 (36%)  | 0       | 1 (9%)   | 1 (9%)   | 7 (64%)  | -1 (9%)   | 5 (45%)  |
| 6 | -10 (91%) | -1 (9%)  | 0       | 1 (9%)   | 1 (9%)   | 0        | 8 (73%)   | 3 (27%)  |
| 7 | -7 (64%)  | 2 (18%)  | 0       | 0        | 1 (9%)   | 5 (45%)  | 3 (27%)   | 7 (64%)  |
