# Supplementary material for: Bioinformatics analysis of whole slide images reveals significant neighborhood preferences of tumor cells in Hodgkin lymphoma
Source: PLOS journal article supplement (doi:10.1371/journal.pcbi.1007516), 2020-01-21

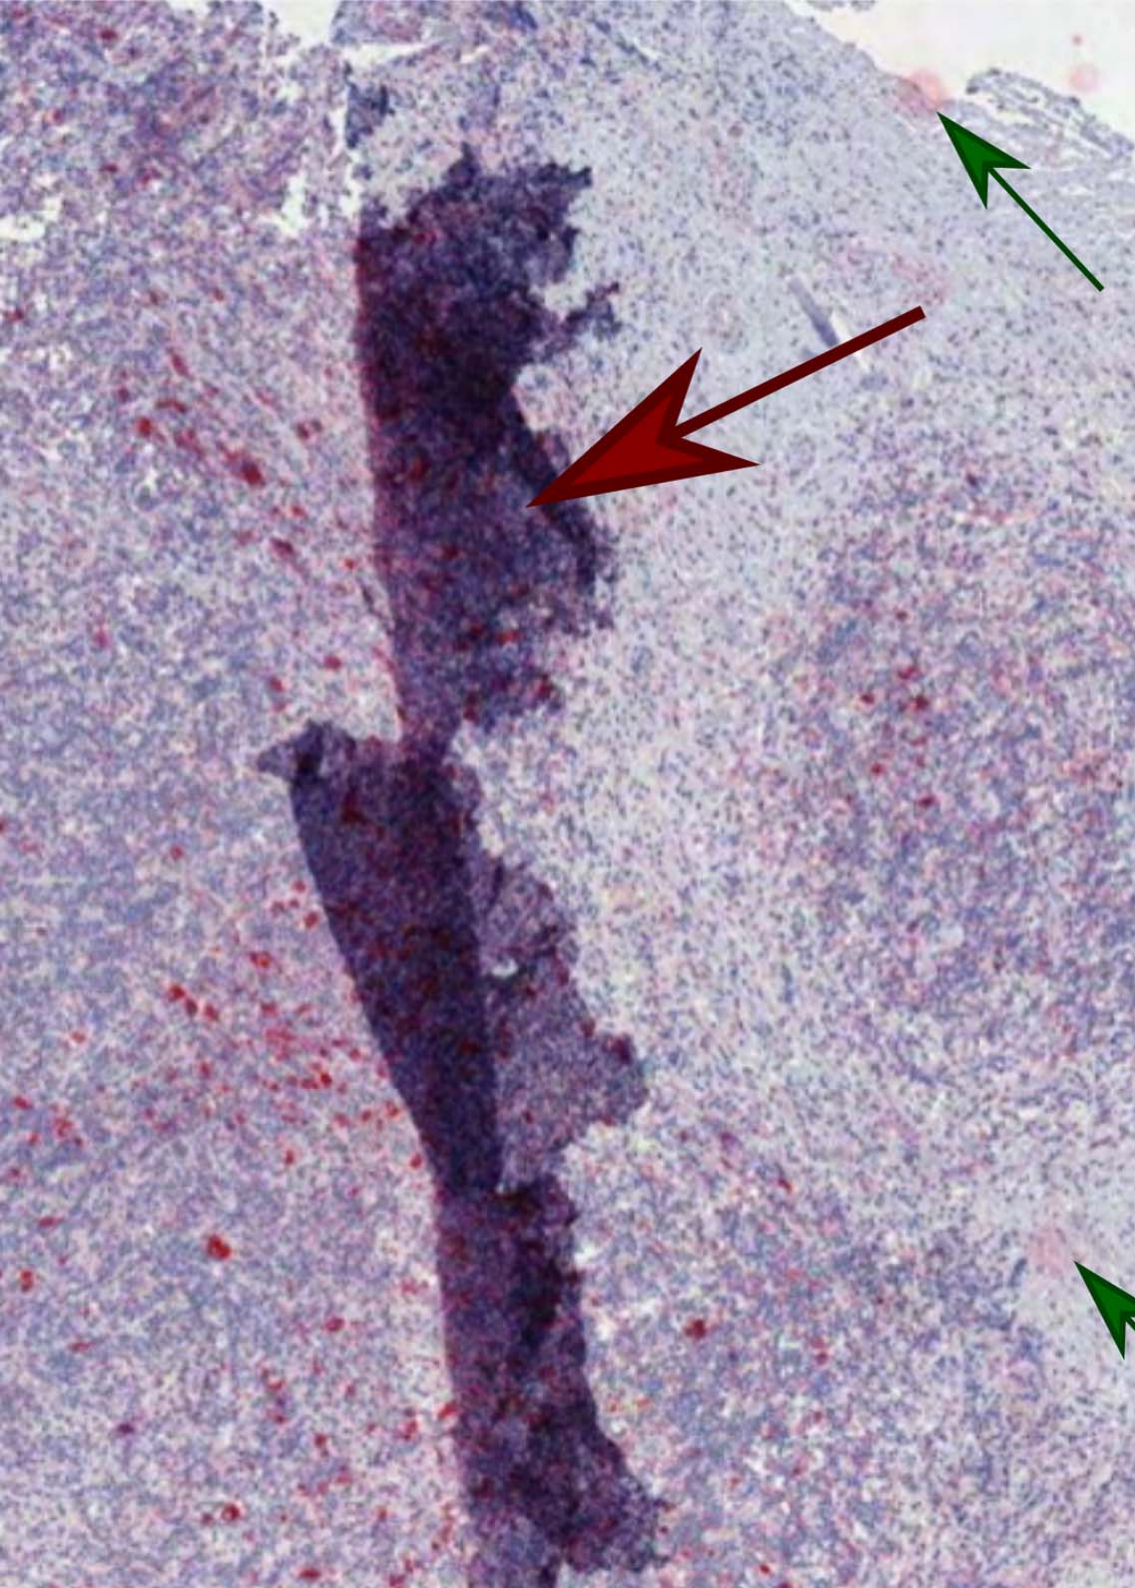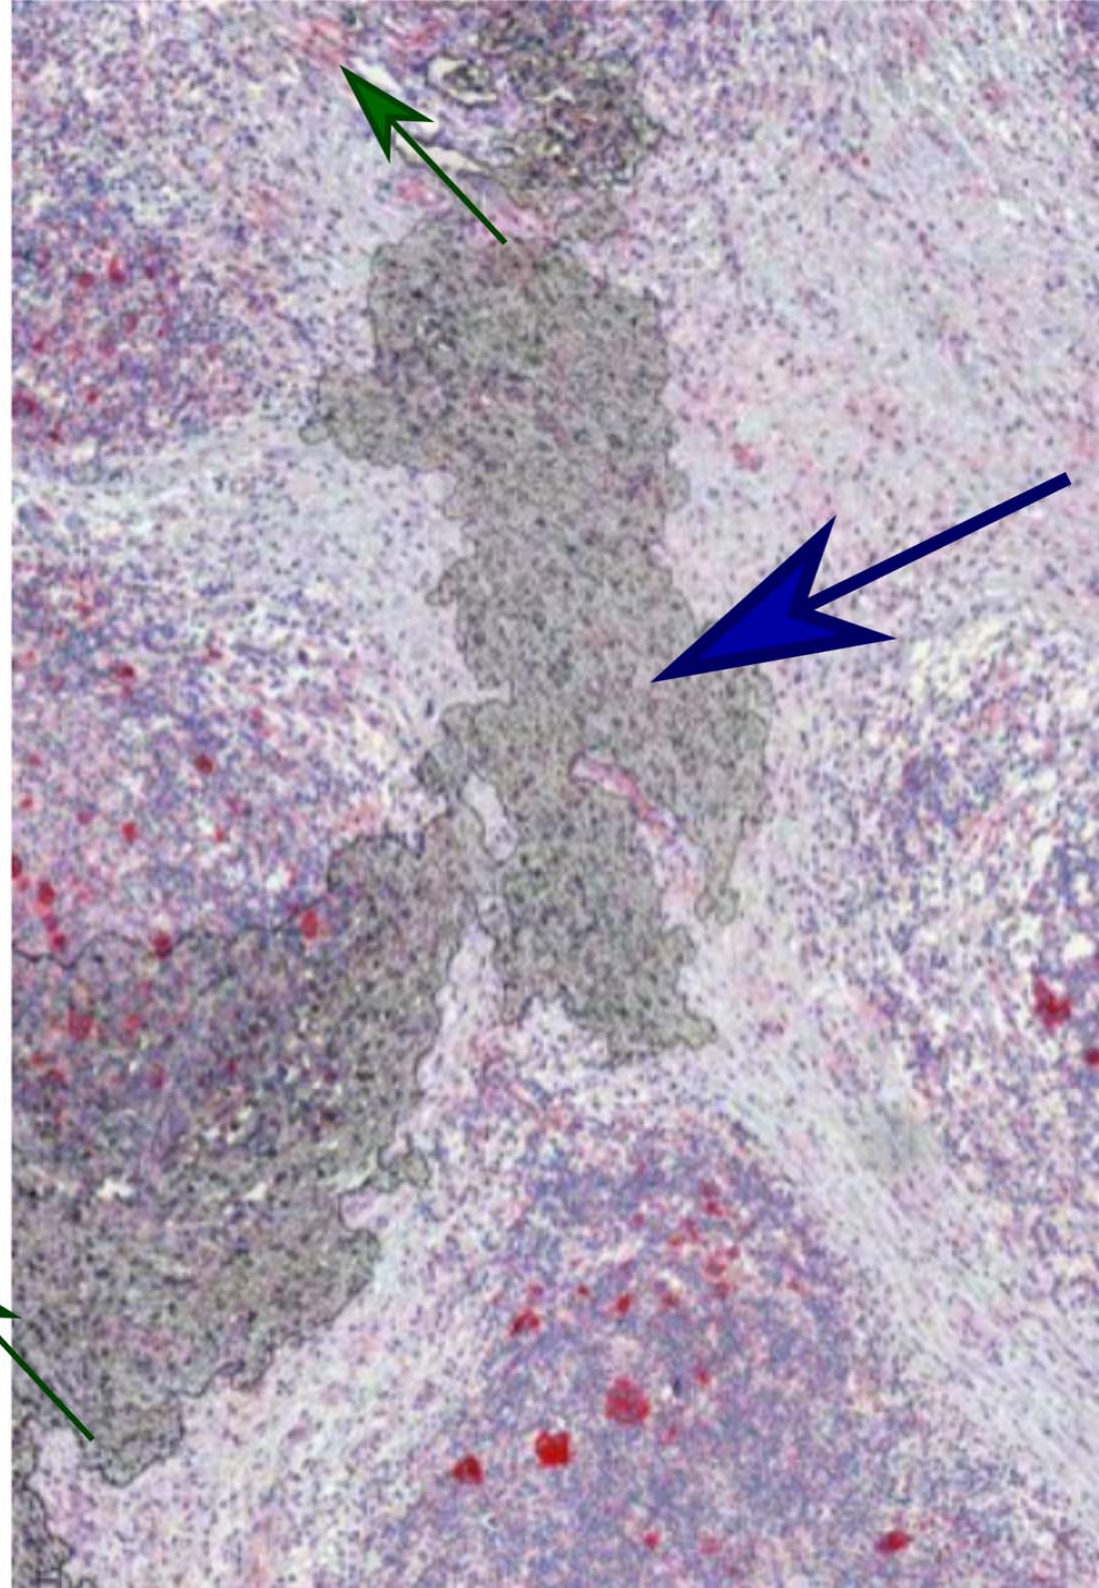

Supplement: S7 (10.1371/journal.pcbi.1007516.s007) [file journal.pcbi.1007516.s007.pdf]
