# Supplementary material for: Bioinformatics analysis of whole slide images reveals significant neighborhood preferences of tumor cells in Hodgkin lymphoma
Source: PLOS journal article supplement (doi:10.1371/journal.pcbi.1007516), 2020-01-21
Supplement: S8 (10.1371/journal.pcbi.1007516.s008) [file journal.pcbi.1007516.s008.pdf]

create ImprImage

conversion to standard TIF files

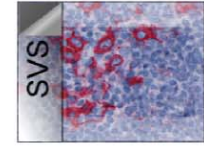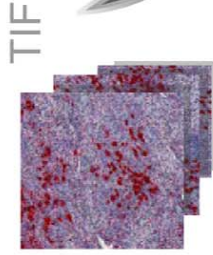

# CD30 pipeline

calculate ROI

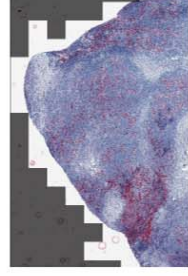

determine tissue

remove background tiles

split image

export tissue tiles with overlapping border

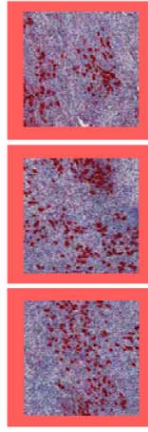

unmix color

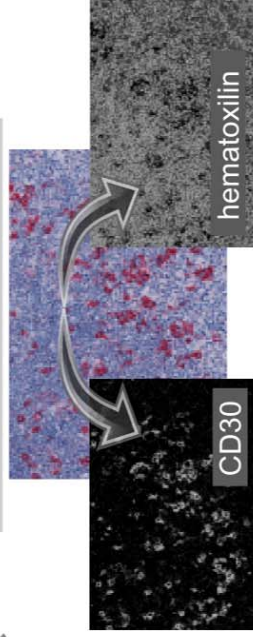

identify cell objects

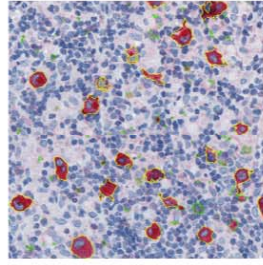

- thresholding of CD30 stain
- filtering of small cell fragments

remove duplicated cells

- border regions are processed twice to avoid dissecting of cell profiles
- filtering of identical cell objects

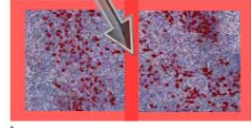

export cell graphs

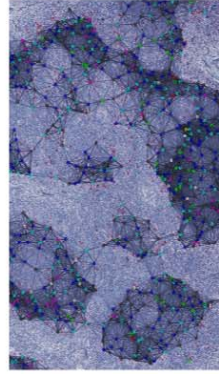

- creation of cell graph and export in edge list format

# CD30 pipeline
