# Supplementary material for: Bioinformatics analysis of whole slide images reveals significant neighborhood preferences of tumor cells in Hodgkin lymphoma
Source: PLOS journal article supplement (doi:10.1371/journal.pcbi.1007516), 2020-01-21
Supplement: S9 (10.1371/journal.pcbi.1007516.s009) [file journal.pcbi.1007516.s009.pdf]

Profile class (PC) mean fractions and their standard deviations for all 35 images and with respect to the diagnosis.

| PC | All images [%] | NScHL [%]    | MCcHL [%]    | LA [%]       |
|----|----------------|--------------|--------------|--------------|
| 0  | 38.63 ±16.03   | 30.93 ±10.51 | 38.32 ±18.30 | 47.36 ±15.13 |
| 1  | 2.63 ± 2.86    | 3.72 ± 2.55  | 1.79 ± 1.39  | 2.37 ± 4.03  |
| 2  | 5.23 ± 2.03    | 5.16 ± 2.09  | 5.88 ± 2.36  | 4.58 ± 1.43  |
| 3  | 0.75 ± 0.87    | 1.13 ± 0.93  | 0.55 ± 0.41  | 0.57 ± 1.08  |
| 4  | 25.47 ± 8.66   | 28.22 ± 8.59 | 27.38 ± 9.3  | 20.39 ± 5.92 |
| 5  | 4.98 ± 4.32    | 7.39 ± 3.73  | 5.09 ± 5.21  | 2.21 ± 1.71  |
| 6  | 18.38 ± 7.14   | 18.32 ± 6.28 | 17.36 ± 5.96 | 19.56 ± 9.37 |
| 7  | 3.93 ± 3.17    | 5.12 ± 2.53  | 3.63 ± 3.32  | 2.95 ± 3.50  |
