# Supplementary material for: Bioinformatics analysis of whole slide images reveals significant neighborhood preferences of tumor cells in Hodgkin lymphoma
Source: PLOS journal article supplement (doi:10.1371/journal.pcbi.1007516), 2020-01-21
Supplement: S10 (10.1371/journal.pcbi.1007516.s010) [file journal.pcbi.1007516.s010.pdf]

The image sizes of all 35 images with respect to the diagnosis

| NScHL  |                   | MCcHL  |                   | LA     |                   |
|--------|-------------------|--------|-------------------|--------|-------------------|
| SVS id | sqrt(roi)<br>[px] | SVS id | sqrt(roi)<br>[px] | SVS id | sqrt(roi)<br>[px] |
| 7489   | 48378             | 5617   | 71885             | 6275   | 40857             |
| 7228   | 45977             | 7082   | 62051             | 6277   | 35825             |
| 6292   | 38205             | 5800   | 24405             | 5558   | 36636             |
| 6286   | 30515             | 6643   | 52773             | 5566   | 38315             |
| 7480   | 52853             | 5824   | 58993             | 5559   | 47942             |
| 7358   | 51892             | 5722   | 41266             | 5565   | 44588             |
| 5070   | 64626             | 7486   | 47844             | 5556   | 60407             |
| 2952   | 34392             | 5822   | 55097             | 5561   | 34996             |
| 2961   | 66489             | 5796   | 66228             | 5557   | 40028             |
| 2140   | 53327             | 6267   | 56534             | 5161   | 36175             |
| 6637   | 56087             | 1721   | 53080             | 5563   | 65855             |
| 1724   | 63785             | 2949   | 32896             |        |                   |
