# Supplementary material for: Bioinformatics analysis of whole slide images reveals significant neighborhood preferences of tumor cells in Hodgkin lymphoma
Source: PLOS journal article supplement (doi:10.1371/journal.pcbi.1007516), 2020-01-21
Supplement: S12 (10.1371/journal.pcbi.1007516.s012) [file journal.pcbi.1007516.s012.pdf]

Probabilities and conditional probabilities. PC stands for profile class and NPC for neighbor profile class. Part (A): The eight entries give the relative frequency of each PC in an image of the diagnosis MCcHL (ID = 1721). For example, 31,6% of the 10,860 cells are small, round (PC = 0). Part (B): The 64 entries give the conditional probabilities,  $P(\text{NPC} = j \mid \text{PC} = i)$ , to find an NPC =  $j$  for a PC =  $i$ . The conditional probability is approximated by  $P(\text{NPC} = j \mid \text{PC} = i) = f(i, j)/f(i)$ , where  $f(i, j)$  is the frequency of pairs (PC =  $i$ , NPC =  $j$ ) in the neighborhood list. For example, the nearest neighbor of a small, round PC (PC = 0) is as well small, round (NPC = 0) with a probability of 0.354.

(A)

| <i>PC</i> | 0    | 1    | 2    | 3    | 4    | 5    | 6    | 7    |
|-----------|------|------|------|------|------|------|------|------|
|           | .316 | .017 | .046 | .012 | .376 | .015 | .199 | .018 |

(B)

| <i>PC</i>  | 0    | 1    | 2    | 3    | 4    | 5    | 6    | 7    |
|------------|------|------|------|------|------|------|------|------|
| <i>NPC</i> |      |      |      |      |      |      |      |      |
| 0          | .354 | .246 | .323 | .248 | .308 | .226 | .289 | .202 |
| 1          | .013 | .110 | .016 | .105 | .012 | .067 | .015 | .071 |
| 2          | .049 | .033 | .077 | .113 | .036 | .067 | .053 | .081 |
| 3          | .009 | .076 | .026 | .068 | .007 | .055 | .015 | .066 |
| 4          | .384 | .262 | .289 | .195 | .418 | .213 | .374 | .242 |
| 5          | .011 | .055 | .020 | .053 | .007 | .128 | .009 | .045 |
| 6          | .167 | .126 | .228 | .135 | .203 | .158 | .221 | .157 |
| 7          | .012 | .093 | .022 | .083 | .009 | .085 | .020 | .136 |
